# Supplementary material
Source: Royal Society of Chemistry journal article supplement (doi:10.1039/d5an00949a)
Supplement: d5an00949a1.pdf [file d5an00949a1.pdf]

## Supplementary Materials

### Non-invasive detection of Oncostatin M and TNF- $\alpha$ biomarkers for inflammatory bowel disease in a microphysiological chip with embedded pH tuning capabilities

Daniele Bellisario<sup>a</sup>, Alessandra Calogiuri<sup>a\*</sup>, Elisa Sciurti<sup>a</sup>, Laura Blasi<sup>a</sup>, Vanessa Esposito<sup>a</sup>, Flavio Casino<sup>a</sup>, Pietro Siciliano<sup>a</sup>, Antonio Della Torre<sup>a</sup>  
and Luca Francioso<sup>a</sup>

<sup>a</sup>Institute for Microelectronics and Microsystems CNR-IMM, Via per Monteroni “Campus Ecotekne”, Lecce, Italy

\* Author to whom correspondence should be addressed: [alessandracalogiuri@cnr.it](mailto:alessandracalogiuri@cnr.it)

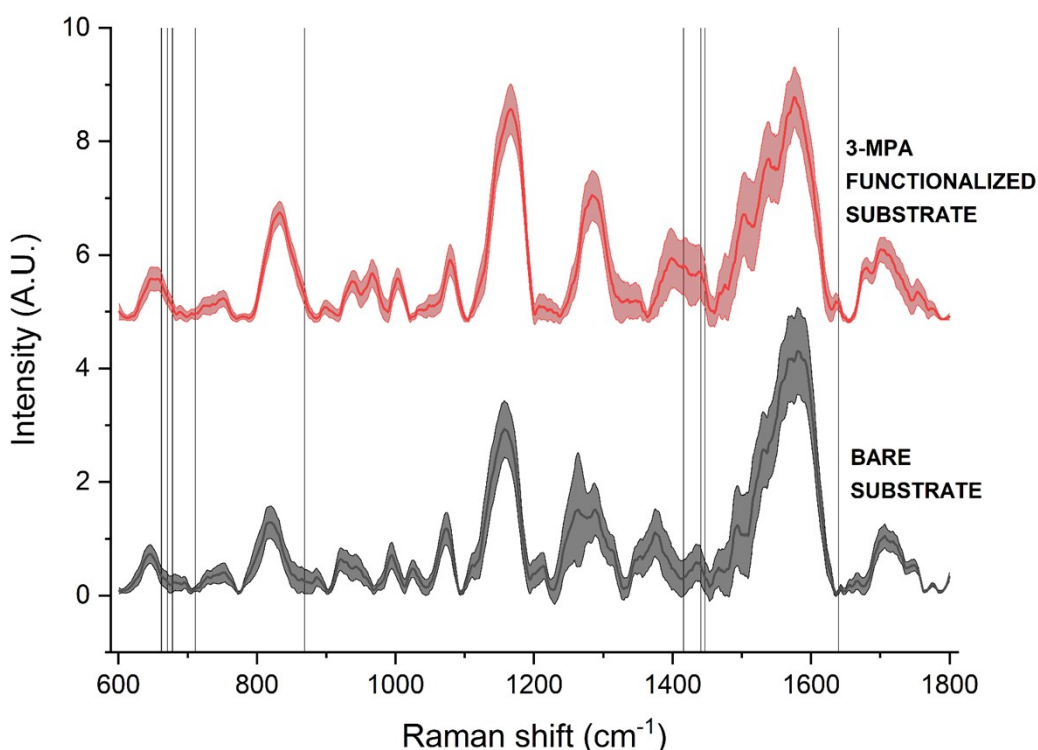

**Figure S1:** Off-chip reference SERS spectra of the commercial substrate before and after 3-MPA functionalization. Shaded areas represent the standard deviation ( $n = 64$ ). Compared to the bare substrate, the functionalized substrate presents additional peaks consistent with a 3-MPA layer. In particular, the main peaks observed after 3-MPA functionalization are: 662, 671, 678, 711  $\text{cm}^{-1}$  ( $\nu(\text{C-S})$ ), 869  $\text{cm}^{-1}$  (thiol-related mode), 1416  $\text{cm}^{-1}$  (carboxylate symmetric stretch,  $\nu(\text{COO}^-)$ ), 1441 and 1447  $\text{cm}^{-1}$  ( $\delta(\text{CH}_2)$  with contributions from C–O/OH modes), and 1640  $\text{cm}^{-1}$  (carbonyl/carboxylate region) [1-3].

**Table S.1** The assignments of Raman peaks for characterization of OSM.

| Peak no | Peak Center (cm <sup>-1</sup> ) | Assignment                                           |
|---------|---------------------------------|------------------------------------------------------|
| 1       | 688                             | C-S stretch                                          |
| 2       | 722                             | C-S stretch                                          |
| 3       | 733                             | C-S stretch                                          |
| 4       | 763                             | Tryptophan                                           |
| 5       | 805                             | Proline, hydroxyproline, tyrosine                    |
| 6       | 814                             | Proline, hydroxyproline, tyrosine                    |
| 7       | 823                             | Out-of-plane ring breathing, tyrosine                |
| 8       | 852                             | Proline, hydroxyproline, tyrosine, glutamine         |
| 9       | 885                             | Proteins, including collagen                         |
| 10      | 895                             | C-C skeletal                                         |
| 11      | 919                             | Proline, hydroxyproline                              |
| 12      | 969                             | Phosphate monoester groups of phosphorylated protein |
| 13      | 1004                            | Phenylalanine                                        |
| 14      | 1032                            | CH <sub>2</sub> CH <sub>3</sub> bending modes        |
| 15      | 1060                            | C-C in-plane bending                                 |
| 16      | 1063                            | C-C skeletal stretch random conformation             |
| 17      | 1202                            | Aromatic C-O and C-N                                 |
| 18      | 1450                            | CH <sub>2</sub> bending, glutamine                   |
| 19      | 1573                            | C-C stretching                                       |
| 20      | 1579                            | C-C stretching                                       |
| 21      | 1593                            | C=N and C=C stretching                               |
| 22      | 1678                            | C=O stretching                                       |
| 23      | 1683                            | Amide I (disordered structure; non-hydrogen bonded)  |
| 24      | 1692                            | Amide I of proteins                                  |

**Table S.2** The assignments of Raman peaks for characterization of TNF- $\alpha$ .

| Peak no | Peak Center (cm <sup>-1</sup> ) | Assignment                                      |
|---------|---------------------------------|-------------------------------------------------|
| 1       | 661                             | C-S stretching mode of cystine                  |
| 2       | 722                             | C-S stretch                                     |
| 3       | 738                             | C-S stretch                                     |
| 4       | 768                             | Tryptophan                                      |
| 5       | 771                             | Tryptophan                                      |
| 6       | 846                             | Tyrosine                                        |
| 7       | 861                             | Tyrosine                                        |
| 8       | 877                             | C-C stretching, hydroxyproline                  |
| 9       | 901                             | C-C stretching                                  |
| 10      | 907                             | C-C stretching                                  |
| 11      | 919                             | Proline, hydroxyproline                         |
| 12      | 925                             | n(C-C), proline & valine (protein band)         |
| 13      | 1101                            | Phenylalanine (proteins)                        |
| 14      | 1105                            | Phenylalanine (proteins)                        |
| 15      | 1182                            | C-H bending mode of structural proteins         |
| 16      | 1198                            | Amide III-Due to C-N stretching and N-H bending |

|    |      |                                                                                            |
|----|------|--------------------------------------------------------------------------------------------|
| 17 | 1202 | Amide III & CH <sub>2</sub> wagging vibrations from glycine backbone & proline side chains |
| 18 | 1450 | CH <sub>2</sub> bending, glutamine                                                         |
| 19 | 1453 | C-H bending mode of structural proteins, glutamine                                         |
| 20 | 1457 | CH <sub>2</sub> /CH <sub>3</sub> deformation                                               |
| 21 | 1573 | C-C stretching                                                                             |
| 22 | 1579 | C-C stretching                                                                             |
| 23 | 1583 | C=C bending mode of phenylalanine                                                          |
| 24 | 1653 | Amide I of proteins                                                                        |
| 25 | 1665 | Amide I of proteins (disordered structure-solvated)                                        |
| 26 | 1667 | Amide I (antiparallel $\beta$ -sheet)                                                      |
| 27 | 1678 | Amide I ( $\beta$ -sheet)                                                                  |
| 28 | 1692 | Amide I of proteins                                                                        |
| 29 | 1697 | Amide I (turns and bands)                                                                  |

### Enzyme-linked Immunosorbent Assay (ELISA) Results

In order to verify whether the washing step with acetone effectively detached the selected proteins, we performed an Enzyme-linked Immunosorbent Assay (ELISA) to quantitatively measure OSM and TNF- $\alpha$  before and after the acetone treatment.

In the case of substrates exposed to OSM, the mean absorbance values decreased from  $1.681 \pm 0.357$  prior to acetone washing to  $0.531 \pm 0.125$  following the treatment, thus approaching the blank control value of  $0.590 \pm 0.106$ . A reproducible reduction in ELISA signal was also observed for TNF- $\alpha$  substrates, with mean absorbance values decreasing from  $0.166 \pm 0.004$  to  $0.144 \pm 0.008$  following acetone washing. In the case of TNF- $\alpha$ , the blank control values were  $0.089 \pm 0.023$ .

The different extent of ELISA signal reduction observed for OSM and TNF- $\alpha$  following acetone washing may be attributed to differences in protein size, protein concentration, conformation, and interaction strength with the SERS surface. Although acetone treatment significantly suppressed the specific ELISA signal for both analytes, the post-washing absorbance values remained slightly higher than the respective blank controls, particularly in the case of TNF- $\alpha$ , thus indicating that complete removal of the bound proteins or background contributions cannot be entirely excluded.

Finally, to test the surface reusability, subsequent to acetone washing, the regenerated SERS substrates were exposed to OSM and analysed once more by ELISA. A measurable ELISA signal was obtained on all samples, although with reduced intensity in comparison to pristine substrates ( $0.49 \pm 0.06$ ). This result indicates a partial loss of surface activity following repeated use and regeneration. In line with these results, the trained ML algorithm also shows reduced efficiency after washing compared to pristine substrates.

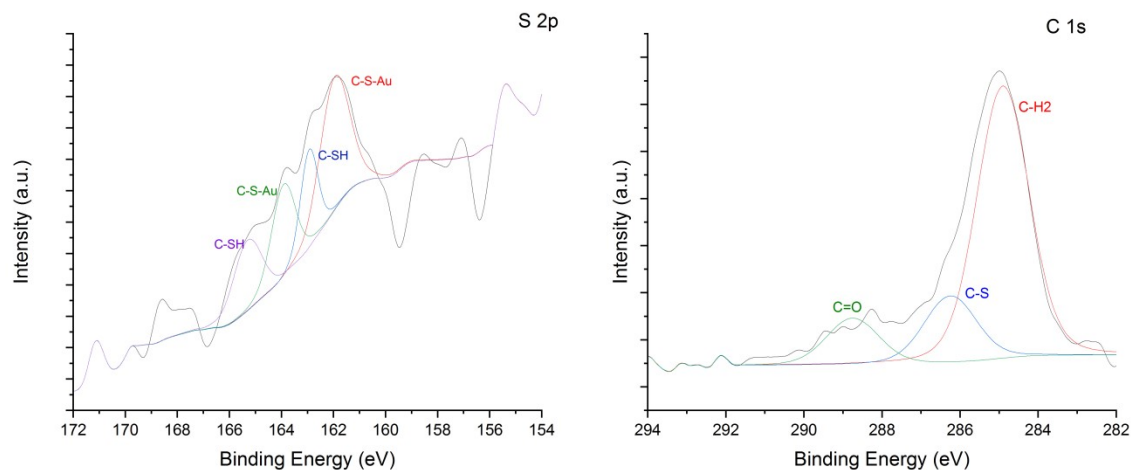

Fig. S2: (a-b) High-resolution spectra for S 2p and C 1s regions are reported with the curve-fitting results and peak component attributions.

In addition to ELISA measurements, XPS analysis was performed on the SERS substrates following acetone washing in order to provide a more comprehensive assessment of surface regeneration at the chemical level. As demonstrated in Fig S1, the S 2p and C 1s spectra obtained following the washing process demonstrate consistency with the presence of the 3-MPA monolayer, with characteristic contributions attributed to C–S/Au–S and C–H/C–S bonds. These results provide further evidence for the effective protein removal while preserving the underlying surface functionalization.

### **OSM classification - Linear Support Vector Machine (SVM) and Linear Discriminant Analysis (LDA) data processing**

The Raman shifts intensities utilized to train the ML models were extracted using the Peak Analyzer tool in OriginPro. Positive peaks were identified by determining local maxima in the spectra using the second derivative method, coupled with a quadratic Savitzky-Golay smoothing (window size of 5), to enhance peak detection while minimizing noise [4], [5]. Each peak's intensity at its corresponding Raman shift was extracted, and only peaks occurring consistently in at least 50% of the measurements for each condition (32 out of 64 spectra for each condition) were retained. After filtering, the final datasets contained 378 peaks for pH 8.5, 327 for pH 7.8, 295 for pH 7.4, 244 peaks for pH 6.8, 301 for pH 6.4 and 297 for pH 4. The dataset was first divided into training (80%) and testing (20%) sets [6]. Feature ranking was then performed exclusively on the training set, using two supervised learning models. The extracted peaks were ranked through an embedded method; therefore, two different linear supervised learning models were trained [7]. A linear Support Vector Machine (SVM) with a box constraint of 10, ranks features based on the weights derived from its linear kernel [8], [9]. Similarly, Linear Discriminant Analysis (LDA) ranked features based on LDA weights [10], [11]. To assess stability across varying data distributions the classification was performed using 10-fold cross-validation [12]. The classification performance of these models was compared using two different feature sets: the top 40 and the top 100 ranked features [13]. The confusion matrix obtained from the test phase of the models with the highest test

accuracy for each pH were illustrated in FigureS1 and FigureS2. In binary classification, the confusion matrix is a 2×2 table in which the rows represent the true classes and the columns represent the predicted classes. The diagonal cells (True Negative + True Positive) represent correct predictions, while the cells outside the diagonal (False Positive + False Negative) represent errors.

TableS1 and TableS2 summarize the resulting performance metrics of the test, moreover, include accuracy derived from the training and test confusion matrix. The performance metrics reported in Tables S1–S4 were derived from the confusion matrices obtained during the test phase with the following formulas:

$$\begin{aligned} \text{Sensitivity (or Recall)} &= \frac{TP}{(TP + FN)} \\ \text{Specificity} &= \frac{TN}{(TN + FP)} \\ \text{Precision} &= \frac{TP}{(TP + FP)} \\ \text{F1\_score} &= 2 \times \frac{(\text{Precision} \times \text{Sensitivity})}{(\text{Precision} + \text{Sensitivity})} \end{aligned}$$

*TP = True Positive TN = True Negative FP = False Positive FN = False Negative*

### **TNF-alpha classification - Linear Support Vector Machine (SVM) and Linear Discriminant Analysis (LDA) data processing**

Peak centers and Raman intensity were identified for each spectrum for all pH values considered, using the peak finding procedure described for Oncostatin M. After filtering, the final datasets contained 337 peaks for pH 8, 264 for pH 7.7, 316 for pH 7.4, 276 peaks for pH 7, 247 for pH 6.4, 249 for pH 5.8, 304 peaks for pH 5.2 and 259 for pH 4. For a more in-depth examination of pH-dependent spectral differences, a supervised classification approach was employed. First, the dataset was randomly divided into training and test sets with an 80/20 ratio, and then the Raman peak centers were ranked based on SVM weights and LDA coefficients, according to the previous analysis. Also, this time, the performance of 3 models was evaluated using 2 sets of ranked features, the top 40 and top 100 features, using 10-fold cross-validation. The classification results and the performance metrics of the test were reported in TableS3 and TableS4. Moreover, the confusion matrix of the models with the highest accuracy in the test phase for each pH was illustrated in FigureS4 and FigureS5. As illustrated in TableS3 and TableS4, 100 features often result in the best way to achieve optimal classification performance when models using features of both LDA and SVM ranking.

**Table S.3** Performance metrics of qSVM, cSVM, and LDA models for Oncostatin M detection using LDA-ranked features with the top 40 and top 100 features at different pH values. Bold values indicate the model with the highest test accuracy for each pH condition.

|      | Model | n° features | Specificity | Precision | Sensitivity | F1_score | Train Accuracy | Test Accuracy |
|------|-------|-------------|-------------|-----------|-------------|----------|----------------|---------------|
| pH 4 | q SVM | 40          | 0,577       | 0,593     | 0,640       | 0,616    | 66.3%          | 60.8%         |
|      |       | 100         | 0,577       | 0,607     | 0,680       | 0,641    | 64.7%          | 62.7%         |
|      | c SVM | 40          | 0,462       | 0,517     | 0,600       | 0,555    | 65.3%          | 52.9%         |
|      |       | 100         | 0,500       | 0,519     | 0,560       | 0,539    | 64.1%          | 52.9%         |

|        |       |            |              |              |              |              |              |              |
|--------|-------|------------|--------------|--------------|--------------|--------------|--------------|--------------|
|        | LDA   | 40         | 0,731        | 0,696        | 0,640        | 0,667        | 74.5%        | 68.6%        |
|        |       | <b>100</b> | <b>0,692</b> | <b>0,704</b> | <b>0,760</b> | <b>0,731</b> | <b>80.9%</b> | <b>72.5%</b> |
| pH 6.4 | q SVM | 40         | 1,000        | 1,000        | 0,920        | 0,958        | 90.7%        | 96.1%        |
|        |       | 100        | 1,000        | 1,000        | 0,960        | 0,980        | 87.3%        | 98%          |
|        | c SVM | 40         | 1,000        | 1,000        | 0,920        | 0,958        | 87.8%        | 96.1%        |
|        |       | <b>100</b> | <b>1,000</b> | <b>1,000</b> | <b>0,960</b> | <b>0,980</b> | <b>87.9%</b> | <b>98%</b>   |
|        | LDA   | 40         | 0,962        | 0,958        | 0,920        | 0,939        | 88.3%        | 94.1%        |
|        |       | 100        | 0,962        | 0,958        | 0,920        | 0,939        | 88.3%        | 94.1%        |
| pH 6.8 | q SVM | 40         | 0,962        | 0,962        | 0,962        | 0,962        | 95.7%        | 96.2%        |
|        |       | 100        | 0,962        | 0,963        | 1,000        | 0,981        | 97.1%        | 98.1%        |
|        | c SVM | 40         | 1,000        | 1,000        | 0,962        | 0,981        | 94.7%        | 98.1%        |
|        |       | 100        | 0,962        | 0,963        | 1,000        | 0,981        | 96.2%        | 98.1%        |
|        | LDA   | 40         | 0,962        | 0,963        | 1,000        | 0,981        | 97.1%        | 98.1%        |
|        |       | <b>100</b> | <b>1,000</b> | <b>1,000</b> | <b>1,000</b> | <b>1,000</b> | <b>99%</b>   | <b>100%</b>  |
| pH 7.4 | q SVM | 40         | 0,680        | 0,704        | 0,679        | 0,691        | 70.7%        | 67.9%        |
|        |       | 100        | 0,760        | 0,793        | 0,821        | 0,807        | 77.7%        | 77.4%        |
|        | c SVM | 40         | 0,720        | 0,731        | 0,679        | 0,704        | 69.8%        | 69.8%        |
|        |       | 100        | 0,680        | 0,742        | 0,821        | 0,780        | 76.8%        | 75.5%        |
|        | LDA   | 40         | 0,800        | 0,821        | 0,821        | 0,821        | 82.3%        | 81.1%        |
|        |       | <b>100</b> | <b>0,920</b> | <b>0,920</b> | <b>0,821</b> | <b>0,868</b> | <b>87%</b>   | <b>86.8%</b> |
| pH 7.8 | q SVM | 40         | 0,808        | 0,844        | 0,900        | 0,871        | 82.5%        | 85.7%        |
|        |       | 100        | 0,731        | 0,794        | 0,900        | 0,844        | 87%          | 82.1%        |
|        | c SVM | 40         | 0,769        | 0,812        | 0,867        | 0,839        | 83.8%        | 82.1%        |
|        |       | 100        | 0,769        | 0,818        | 0,900        | 0,857        | 86.1%        | 83.9%        |
|        | LDA   | 40         | 0,769        | 0,824        | 0,933        | 0,875        | 83.9%        | 85.7%        |
|        |       | <b>100</b> | <b>0,808</b> | <b>0,853</b> | <b>0,967</b> | <b>0,906</b> | <b>95.5%</b> | <b>89.3%</b> |
| pH 8.5 | q SVM | 40         | 0,808        | 0,815        | 0,880        | 0,846        | 89.8%        | 84.3%        |
|        |       | 100        | 0,846        | 0,857        | 0,960        | 0,906        | 93.7%        | 90.2%        |
|        | c SVM | 40         | 0,846        | 0,852        | 0,920        | 0,885        | 91.2%        | 88.2%        |
|        |       | 100        | 0,846        | 0,862        | 1,000        | 0,926        | 93.2%        | 92.2%        |
|        | LDA   | 40         | 0,808        | 0,828        | 0,960        | 0,889        | 95.1%        | 88.2%        |
|        |       | <b>100</b> | <b>1,000</b> | <b>1,000</b> | <b>1,000</b> | <b>1,000</b> | <b>97.5%</b> | <b>100%</b>  |

**Table S.4** Performance metrics of qSVM, cSVM, and LDA models for Oncostatin M detection using SVM-ranked features with the top 40 and top 100 features at different pH values. Bold values indicate the model with the highest test accuracy for each pH condition.

|      | Model | n° features | Specificity  | Precision    | Sensitivity  | F1_score     | Train Accuracy | Test Accuracy |
|------|-------|-------------|--------------|--------------|--------------|--------------|----------------|---------------|
| pH 4 | q SVM | 40          | 0,654        | 0,640        | 0,640        | 0,640        | 56%            | 64.7%         |
|      |       | 100         | 0,654        | 0,640        | 0,640        | 0,640        | 64.2%          | 64.7%         |
|      | c SVM | 40          | 0,615        | 0,565        | 0,520        | 0,542        | 60.3%          | 56.9%         |
|      |       | 100         | 0,615        | 0,615        | 0,640        | 0,627        | 60.7%          | 62.7%         |
|      | LDA   | 40          | 0,808        | 0,828        | 0,960        | 0,889        | 95.1%          | 88.2%         |
|      |       | <b>100</b>  | <b>1,000</b> | <b>1,000</b> | <b>1,000</b> | <b>1,000</b> | <b>97.5%</b>   | <b>100%</b>   |



|        |       |            |              |              |              |              |              |              |
|--------|-------|------------|--------------|--------------|--------------|--------------|--------------|--------------|
|        |       | <b>100</b> | <b>0,885</b> | <b>0,889</b> | <b>0,960</b> | <b>0,923</b> | <b>96.6%</b> | <b>92.2%</b> |
| PH 5.2 | q SVM | 40         | 0,778        | 0,778        | 0,840        | 0,808        | 74.6%        | 80.8%        |
|        |       | 100        | 0,926        | 0,917        | 0,880        | 0,898        | 84.7%        | 90.4%        |
|        | c SVM | 40         | 0,778        | 0,769        | 0,800        | 0,784        | 75.1%        | 78.8%        |
|        |       | 100        | 0,926        | 0,917        | 0,880        | 0,898        | 88%          | 90.4%        |
|        | LDA   | 40         | 0,889        | 0,875        | 0,840        | 0,857        | 81.8%        | 86.5%        |
|        |       | <b>100</b> | <b>0,852</b> | <b>0,857</b> | <b>0,960</b> | <b>0,906</b> | <b>94.2%</b> | <b>90.4%</b> |
| PH 5.8 | q SVM | 40         | 0,857        | 0,833        | 0,741        | 0,784        | 63.6%        | 80%          |
|        |       | <b>100</b> | <b>0,821</b> | <b>0,821</b> | <b>0,852</b> | <b>0,836</b> | <b>73.2%</b> | <b>83.6%</b> |
|        | c SVM | 40         | 0,714        | 0,714        | 0,741        | 0,727        | 64.1%        | 72.7%        |
|        |       | 100        | 0,821        | 0,808        | 0,778        | 0,793        | 73.2%        | 80%          |
|        | LDA   | 40         | 0,786        | 0,727        | 0,593        | 0,653        | 68.6%        | 69.1%        |
|        |       | 100        | 0,786        | 0,769        | 0,741        | 0,755        | 78.2%        | 76.4%        |
| PH 6.4 | q SVM | 40         | 0,760        | 0,769        | 0,769        | 0,769        | 83%          | 76.5%        |
|        |       | 100        | 0,800        | 0,815        | 0,846        | 0,830        | 89.3%        | 82.4%        |
|        | c SVM | 40         | 0,840        | 0,833        | 0,769        | 0,800        | 81%          | 80.4%        |
|        |       | 100        | 0,840        | 0,840        | 0,808        | 0,824        | 89.7%        | 82.4%        |
|        | LDA   | 40         | 0,640        | 0,679        | 0,731        | 0,704        | 82.5%        | 68.6%        |
|        |       | <b>100</b> | <b>0,680</b> | <b>0,765</b> | <b>1,000</b> | <b>0,867</b> | <b>91.2%</b> | <b>84.3%</b> |
| PH 7   | q SVM | 40         | 0,800        | 0,815        | 0,846        | 0,830        | 84%          | 82.4%        |
|        |       | 100        | 0,760        | 0,786        | 0,846        | 0,815        | 86.5%        | 80.4%        |
|        | c SVM | 40         | 0,800        | 0,808        | 0,808        | 0,808        | 80.5%        | 80.4%        |
|        |       | 100        | 0,760        | 0,786        | 0,846        | 0,815        | 86.5%        | 80.4%        |
|        | LDA   | <b>40</b>  | <b>0,840</b> | <b>0,852</b> | <b>0,885</b> | <b>0,868</b> | <b>77.8%</b> | <b>86.3%</b> |
|        |       | 100        | 0,800        | 0,821        | 0,885        | 0,852        | 80.5%        | 84.3%        |
| PH 7.4 | q SVM | 40         | 0,962        | 0,955        | 0,840        | 0,894        | 80.3%        | 90.2%        |
|        |       | 100        | 0,962        | 0,952        | 0,800        | 0,869        | 83.8%        | 88.2%        |
|        | c SVM | 40         | 0,846        | 0,833        | 0,800        | 0,816        | 78.8%        | 82.4%        |
|        |       | 100        | 0,962        | 0,947        | 0,720        | 0,818        | 82.2%        | 84.3%        |
|        | LDA   | 40         | 0,846        | 0,826        | 0,760        | 0,792        | 79.9%        | 80.4%        |
|        |       | <b>100</b> | <b>1,000</b> | <b>1,000</b> | <b>0,840</b> | <b>0,913</b> | <b>90.6%</b> | <b>92.2%</b> |
| PH 7.7 | q SVM | 40         | 0,654        | 0,679        | 0,760        | 0,717        | 72.7%        | 70.6%        |
|        |       | 100        | 0,731        | 0,750        | 0,840        | 0,792        | 76.6%        | 78.4%        |
|        | c SVM | 40         | 0,654        | 0,679        | 0,760        | 0,717        | 73.2%        | 70.6%        |
|        |       | 100        | 0,769        | 0,778        | 0,840        | 0,808        | 80.5%        | 80.4%        |
|        | LDA   | <b>40</b>  | <b>0,769</b> | <b>0,786</b> | <b>0,880</b> | <b>0,830</b> | <b>78.5%</b> | <b>82.4%</b> |
|        |       | 100        | 0,808        | 0,808        | 0,840        | 0,824        | 76.6%        | 82.4%        |
| PH 8   | q SVM | 40         | 0,560        | 0,633        | 0,731        | 0,678        | 62.4%        | 64.7%        |
|        |       | 100        | 0,760        | 0,778        | 0,808        | 0,793        | 74.6%        | 78.4%        |
|        | c SVM | 40         | 0,640        | 0,667        | 0,692        | 0,679        | 65.8%        | 66.7%        |
|        |       | 100        | 0,720        | 0,741        | 0,769        | 0,755        | 73.7%        | 74.5%        |
|        | LDA   | 40         | 0,680        | 0,714        | 0,769        | 0,740        | 73.1%        | 72.5%        |
|        |       | <b>100</b> | <b>0,840</b> | <b>0,833</b> | <b>0,769</b> | <b>0,800</b> | <b>92.2%</b> | <b>80.4%</b> |

**Table S.6** Performance metrics of qSVM, cSVM, and LDA models for TNF- $\alpha$  detection using SVM-ranked features with the top 40 and top 100 features at different pH values. Bold values indicate the model with the highest test accuracy for each pH condition.

|        | Model | n° features | Specificity  | Precision    | Sensitivity  | F1_score     | Train Accuracy | Test Accuracy |
|--------|-------|-------------|--------------|--------------|--------------|--------------|----------------|---------------|
| pH 4   | q SVM | 40          | 0,923        | 0,923        | 0,960        | 0,941        | 86,9%          | 94,1%         |
|        |       | 100         | 0,962        | 0,962        | 1,000        | 0,981        | 91,7%          | 98,0%         |
|        | c SVM | 40          | 0,923        | 0,926        | 1,000        | 0,962        | 89,3%          | 96,1%         |
|        |       | <b>100</b>  | <b>1,000</b> | <b>1,000</b> | <b>1,000</b> | <b>1,000</b> | <b>93,6%</b>   | <b>100,0%</b> |
|        | LDA   | 40          | 0,962        | 0,962        | 1,000        | 0,981        | 86,9%          | 98,0%         |
|        |       | 100         | 0,846        | 0,846        | 0,880        | 0,863        | 89,2%          | 86,3%         |
| pH 5.2 | q SVM | 40          | 0,852        | 0,852        | 0,920        | 0,885        | 85,7%          | 88,5%         |
|        |       | 100         | 0,889        | 0,875        | 0,840        | 0,857        | 91,9%          | 86,5%         |
|        | c SVM | 40          | 0,815        | 0,828        | 0,960        | 0,889        | 84,7%          | 88,5%         |
|        |       | 100         | 0,852        | 0,852        | 0,920        | 0,885        | 91,4%          | 88,5%         |
|        | LDA   | 40          | 0,815        | 0,821        | 0,920        | 0,868        | 86,6%          | 86,5%         |
|        |       | <b>100</b>  | <b>0,889</b> | <b>0,893</b> | <b>1,000</b> | <b>0,943</b> | <b>89,5%</b>   | <b>94,2%</b>  |
| pH 5.8 | q SVM | 40          | 0,964        | 0,952        | 0,741        | 0,833        | 73,6%          | 85,5%         |
|        |       | 100         | 0,893        | 0,870        | 0,741        | 0,800        | 79,1%          | 81,8%         |
|        | c SVM | <b>40</b>   | <b>0,929</b> | <b>0,913</b> | <b>0,778</b> | <b>0,840</b> | <b>75,5%</b>   | <b>85,5%</b>  |
|        |       | 100         | 0,893        | 0,870        | 0,741        | 0,800        | 81,8%          | 81,8%         |
|        | LDA   | 40          | 0,929        | 0,895        | 0,630        | 0,739        | 74,5%          | 78,2%         |
|        |       | 100         | 0,893        | 0,880        | 0,815        | 0,846        | 79,5%          | 85,5%         |
| pH 6.4 | q SVM | 40          | 0,800        | 0,800        | 0,769        | 0,784        | 90,7%          | 78,4%         |
|        |       | 100         | 0,800        | 0,815        | 0,846        | 0,830        | 95,1%          | 82,4%         |
|        | c SVM | 40          | 0,880        | 0,870        | 0,769        | 0,816        | 92,7%          | 82,4%         |
|        |       | <b>100</b>  | <b>0,880</b> | <b>0,880</b> | <b>0,846</b> | <b>0,863</b> | <b>93,2%</b>   | <b>86,3%</b>  |
|        | LDA   | 40          | 0,760        | 0,769        | 0,769        | 0,769        | 91,7%          | 76,5%         |
|        |       | 100         | 0,840        | 0,852        | 0,885        | 0,868        | 90,3%          | 86,3%         |
| pH 7   | q SVM | 40          | 0,800        | 0,839        | 1,000        | 0,912        | 84,0%          | 90,2%         |
|        |       | 100         | 0,800        | 0,821        | 0,885        | 0,852        | 86,9%          | 84,3%         |
|        | c SVM | 40          | 0,800        | 0,839        | 1,000        | 0,912        | 86,0%          | 90,2%         |
|        |       | 100         | 0,800        | 0,821        | 0,885        | 0,852        | 86,4%          | 84,3%         |
|        | LDA   | <b>40</b>   | <b>0,880</b> | <b>0,897</b> | <b>1,000</b> | <b>0,946</b> | <b>84,5%</b>   | <b>94,1%</b>  |
|        |       | 100         | 0,920        | 0,923        | 0,923        | 0,923        | 82,5%          | 92,2%         |
| pH 7.4 | q SVM | 40          | 0,769        | 0,778        | 0,840        | 0,808        | 87,1%          | 80,4%         |
|        |       | 100         | 0,885        | 0,875        | 0,840        | 0,857        | 89,2%          | 86,3%         |
|        | c SVM | 40          | 0,692        | 0,724        | 0,840        | 0,778        | 86,2%          | 76,5%         |
|        |       | 100         | 0,808        | 0,808        | 0,840        | 0,824        | 86,8%          | 82,4%         |
|        | LDA   | <b>40</b>   | <b>0,885</b> | <b>0,880</b> | <b>0,880</b> | <b>0,880</b> | <b>88,7%</b>   | <b>88,2%</b>  |
|        |       | 100         | 0,923        | 0,905        | 0,760        | 0,826        | 92,6%          | 84,3%         |
| pH 7.7 | q     | 40          | 0,846        | 0,840        | 0,840        | 0,840        | 87,8%          | 84,3%         |

|      |       |     |              |              |              |              |              |              |
|------|-------|-----|--------------|--------------|--------------|--------------|--------------|--------------|
|      | SVM   | 100 | 0,846        | 0,846        | 0,880        | 0,863        | 83,9%        | 86,3%        |
|      | c SVM | 40  | 0,846        | 0,840        | 0,840        | 0,840        | 86,3%        | 84,3%        |
|      |       | 100 | 0,846        | 0,840        | 0,840        | 0,840        | 84,3%        | 84,3%        |
|      | LDA   | 40  | 0,923        | 0,920        | 0,920        | 0,920        | 95,1%        | 92,2%        |
|      |       | 100 | <b>0,962</b> | <b>0,962</b> | <b>1,000</b> | <b>0,981</b> | <b>92,2%</b> | <b>98,0%</b> |
| pH 8 | q SVM | 40  | 0,640        | 0,700        | 0,808        | 0,750        | 78,0%        | 72,5%        |
|      |       | 100 | 0,680        | 0,714        | 0,769        | 0,740        | 81,0%        | 72,5%        |
|      | c SVM | 40  | 0,640        | 0,700        | 0,808        | 0,750        | 78,1%        | 72,5%        |
|      |       | 100 | 0,720        | 0,750        | 0,808        | 0,778        | 81,9%        | 76,5%        |
|      | LDA   | 40  | <b>0,640</b> | <b>0,727</b> | <b>0,923</b> | <b>0,813</b> | <b>79,5%</b> | <b>78,4%</b> |
|      |       | 100 | 0,680        | 0,733        | 0,846        | 0,785        | 87,3%        | 76,5%        |

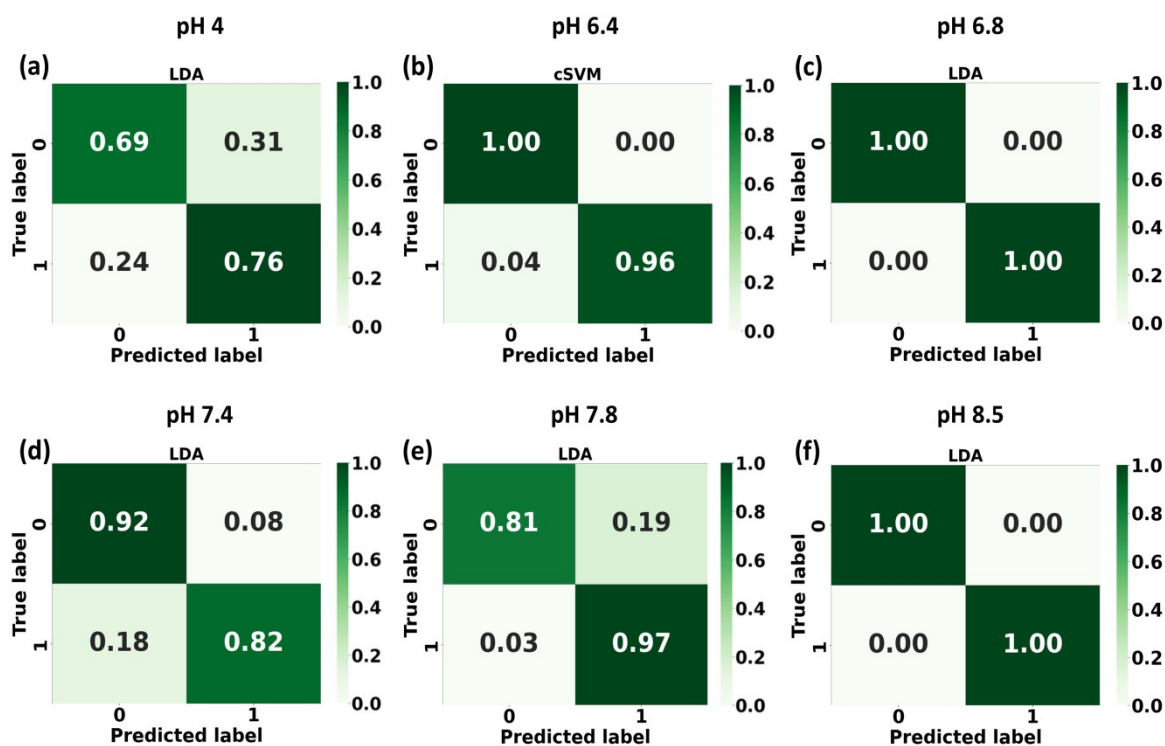

**Figure S3:** Confusion matrices for the test phase of OSM detection models with the highest accuracy obtained with LDA ranking for each pH. (a) pH 4, LDA model, 100 features; (b) pH 6.4, cSVM model, 100 features; (c) pH 6.8, LDA model, 100 features; (d) pH 7.4, LDA model, 100 features; (e) pH 7.8, LDA model, 100 features; (f) pH 8.5, LDA model, 100 features.

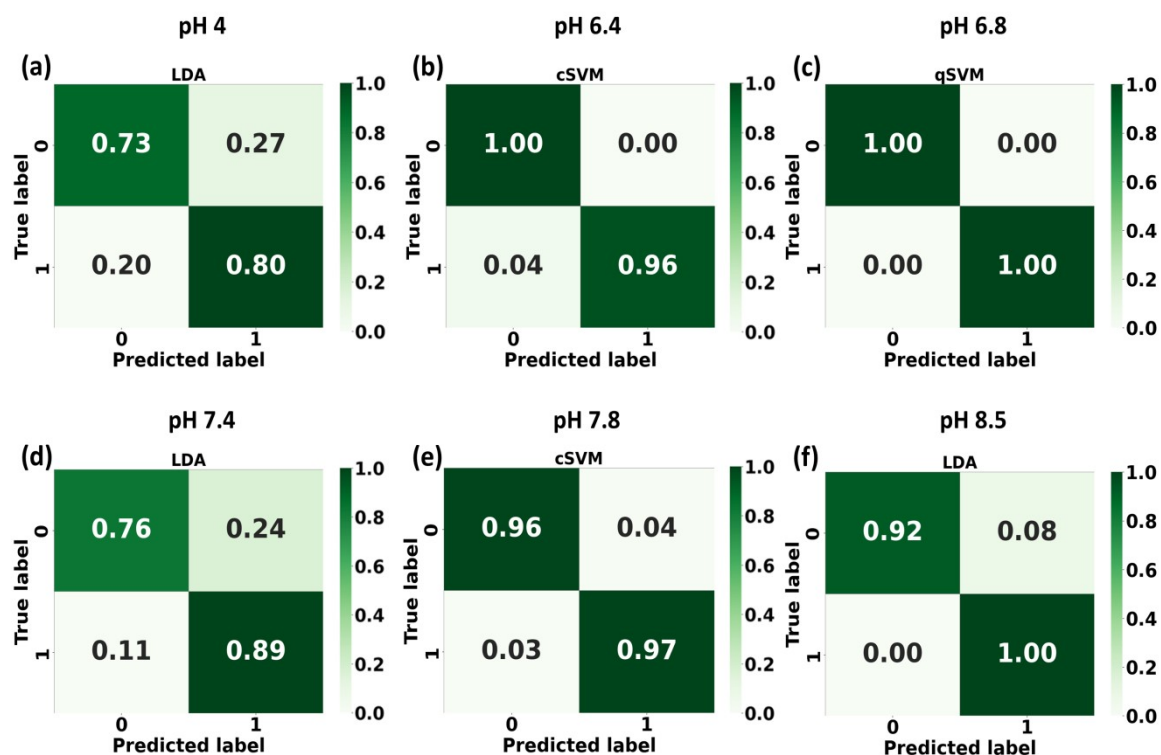

**Figure S4:** Confusion matrices for the test phase of OSM detection models with the highest accuracy with SVM ranking for each pH. (a) pH 4, LDA model, 40 features; (b) pH 6.4, cSVM, 100 features; (c) pH 6.8, qSVM, 40 features; (d) pH 7.4, LDA model, 100 features; (e) pH 7.8, cSVM, 100 features; (f) pH 8.5, LDA model, 100 features

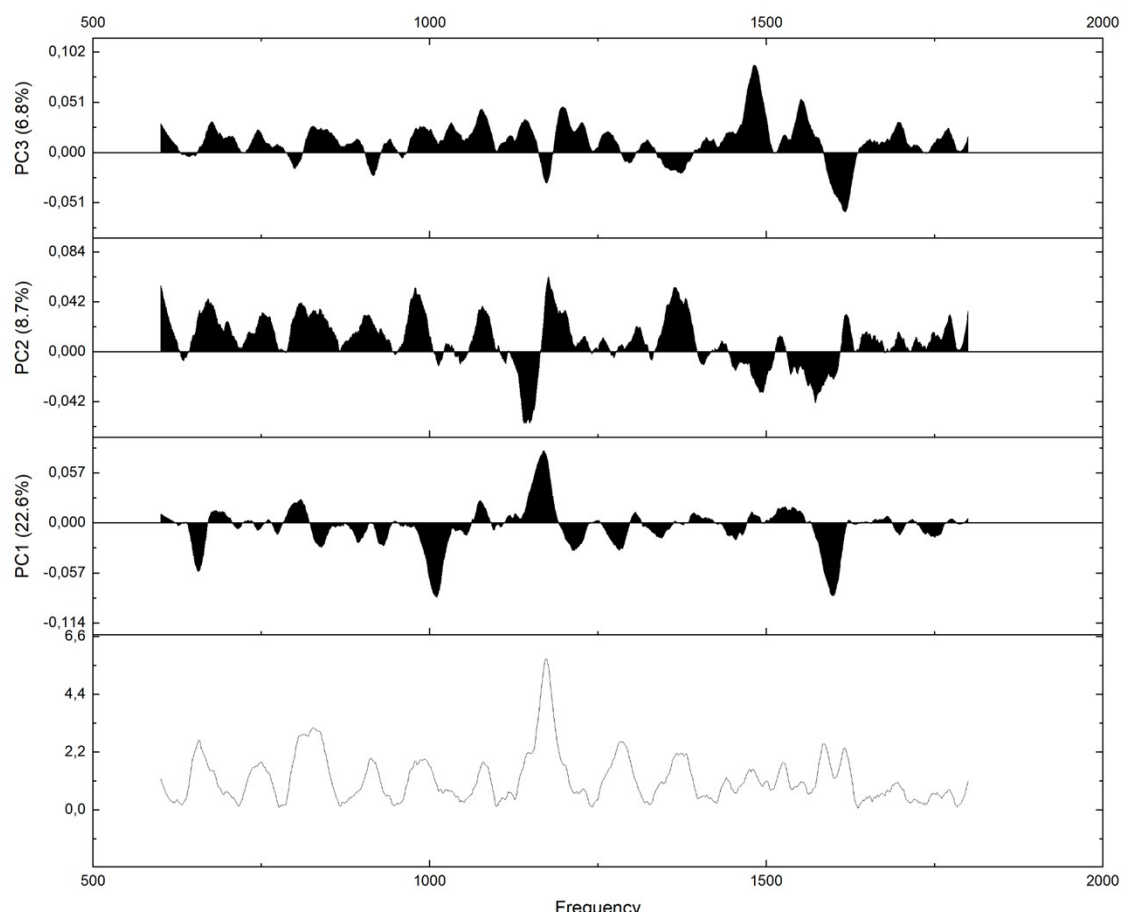

**Figure S5:** Loading plots of the first three principal components (PC1, PC2, and PC3) from PCA performed between F12K medium and F12K + OSM 25 ng/mL at optimal pH. The mean spectra for OSM acquisitions at the optimized pH are also shown.

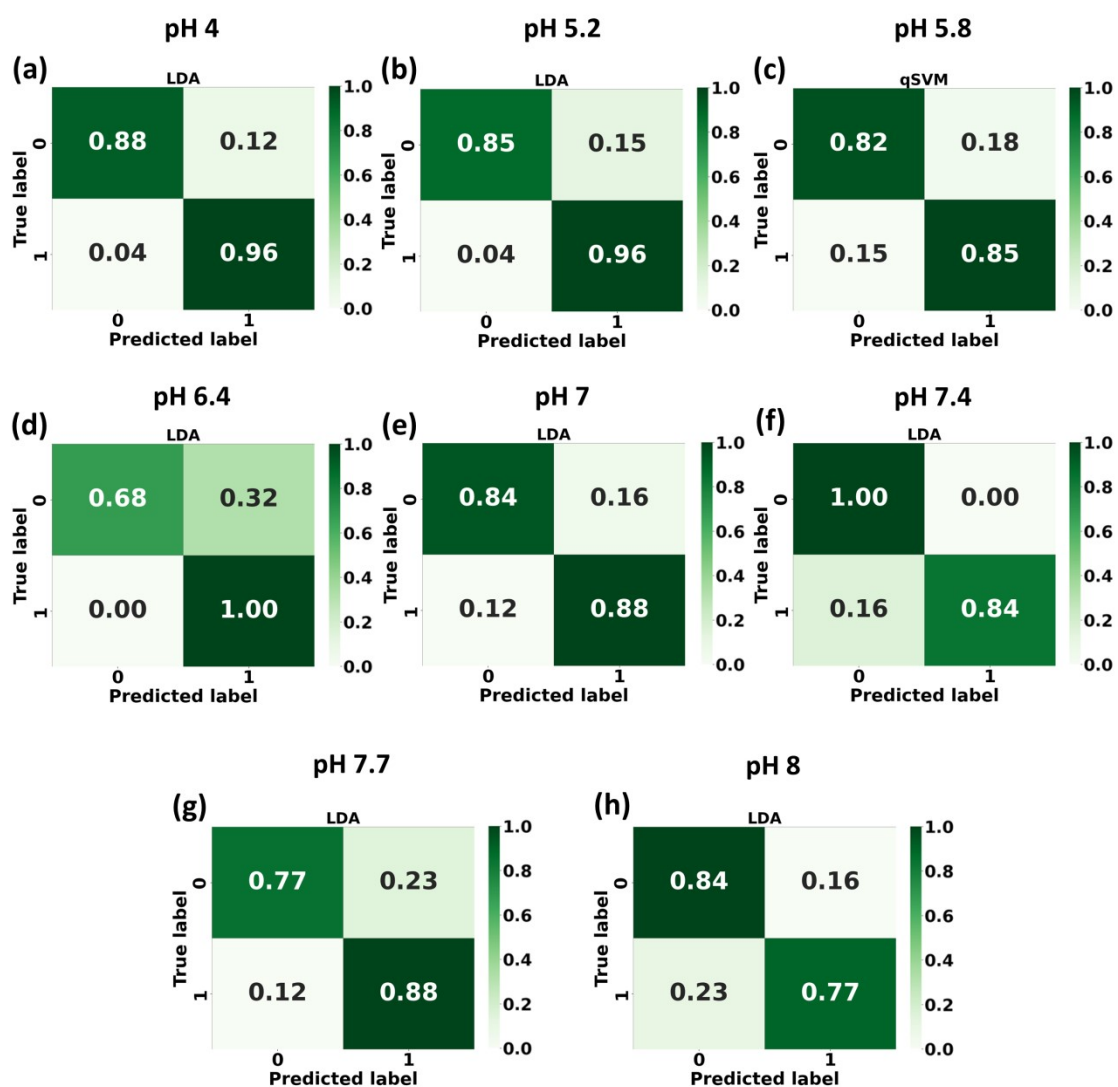

**Figure S6:** Confusion matrices for the test phase of TNF detection models with the highest accuracy with LDA ranking for each pH. (a) pH 4, LDA model, 100 features; (b) pH 5.2, 100 features; LDA model (c) pH 5.8, qSVM model, 100 features; (d) pH 6.4, LDA model, 100 features; (e) pH 7, LDA model, 40 features; (f) pH 7.4, LDA model, 100 features; (g) pH 7.7, LDA model, 40 features; (h) pH 8, LDA model, 100 features

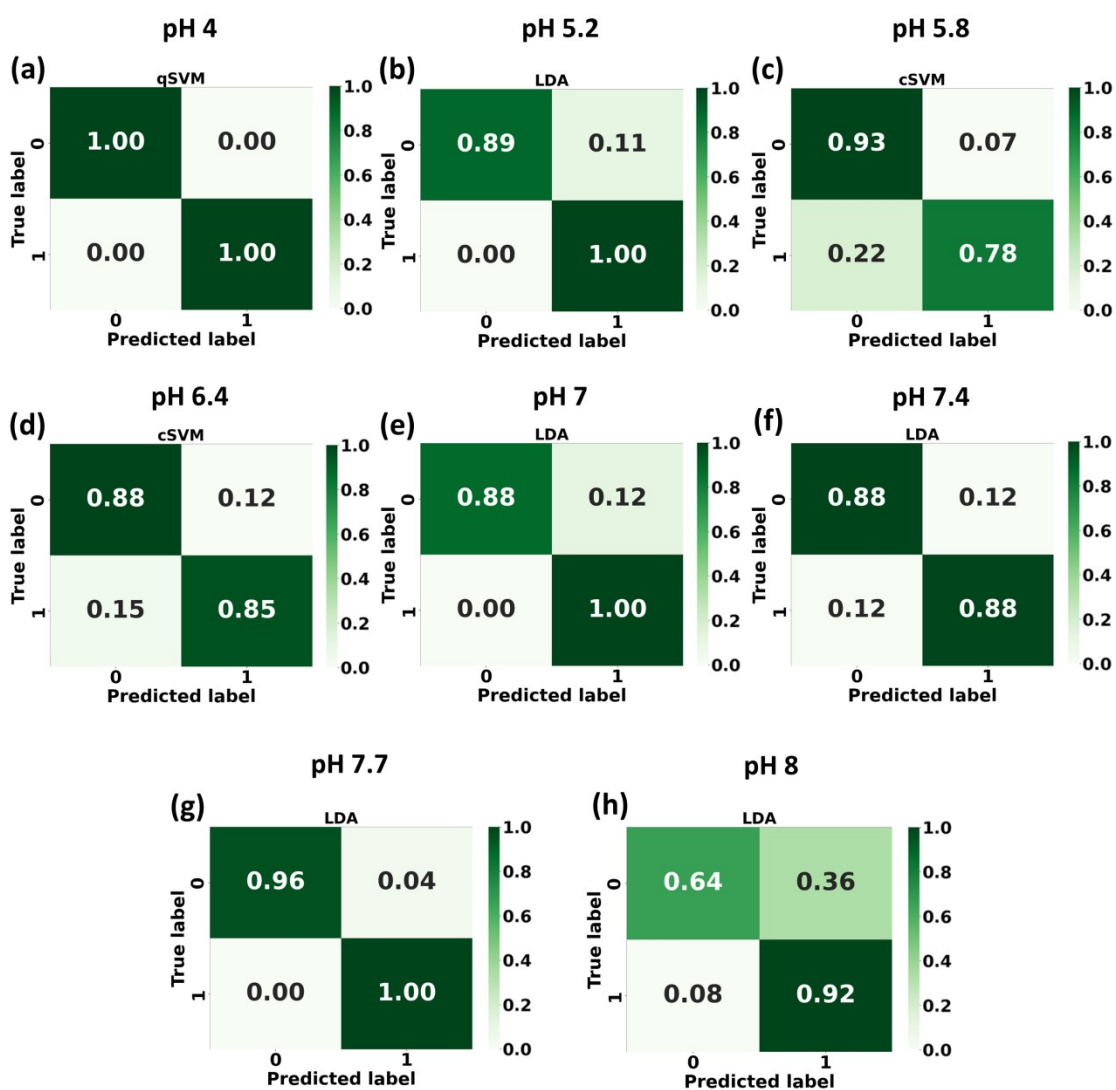

**Figure S7:** Confusion matrices for the test phase of TNF detection models with the highest accuracy with SVM ranking for each pH. (a) pH 4, qSVM model, 100 features; (b) pH 5.2, LDA model, 100 features; (c) pH 5.8, cSVM, 40 features; (d) pH 6.4, cSVM model, 100 features; (e) pH 7, LDA model, 40 features; (f) pH 7.4, LDA model, 40 features; (g) pH 7.7, LDA model, 100 features; (h) pH 8, LDA model, 40 features

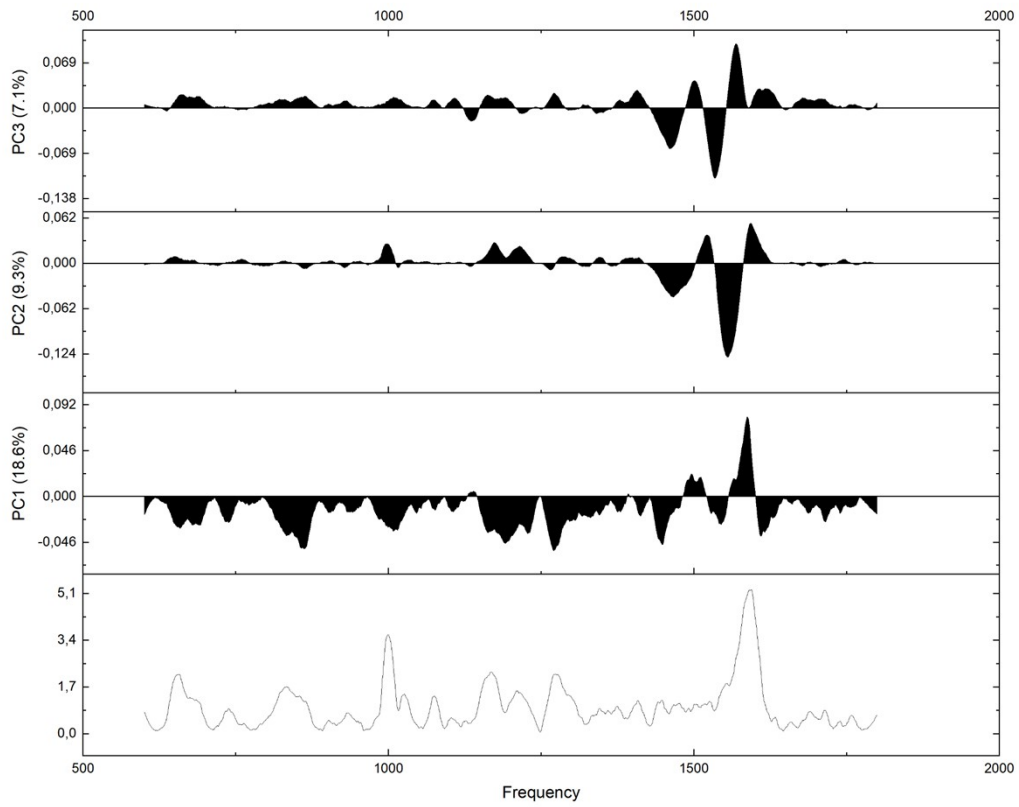

**Figure S8:** Loading plots of the first three principal components (PC1, PC2, and PC3) from PCA performed between F12K medium and F12K + TNF- $\alpha$  100 pg/mL at optimal pH. The mean spectra for TNF- $\alpha$  acquisitions at the optimized pH are also reported.

**Table S7:** Optimized hyperparameters for Oncostatin M obtained model at optimal pH

| Model      | Hyperparameter | Value  |
|------------|----------------|--------|
| Linear SVM | Kernel         | Linear |
|            | C              | 0.5801 |
|            | Coef0          | 1      |
|            | Gamma          | Scale  |
|            | Tol            | 0.0077 |

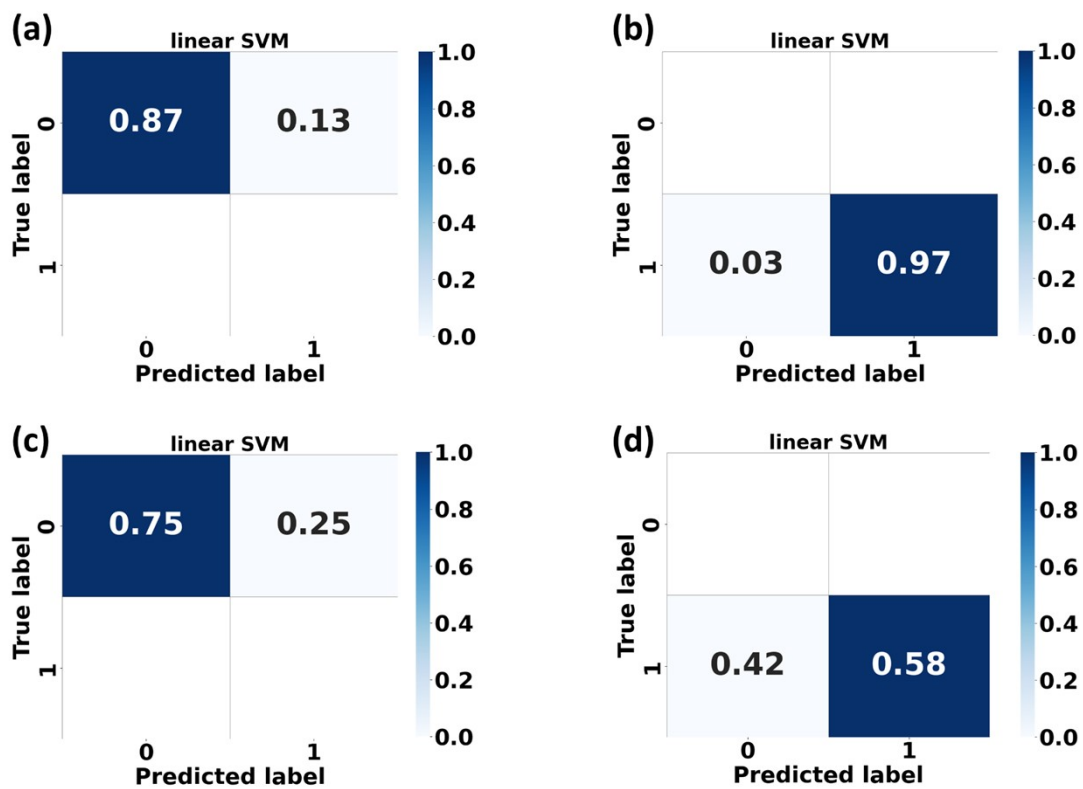

**Figure S9:** Confusion matrices for the test phase of the optimized Linear SVM models at optimal pH (6.8) for OSM detection, shown class by class. (a) Class 1: F12K medium (64 spectra), (b) Class 2: F12K + OSM (64 spectra), (c) Class 1: F12K + TNF (64 spectra), and (d) Class 2: F12K + TNF + OSM (64 spectra).

**Table S8:** Optimized hyperparameters for the TNF- $\alpha$  model obtained at optimal pH

| Model      | Hyperparameter | Value  |
|------------|----------------|--------|
| Linear SVM | Kernel         | Linear |
|            | C              | 2.3369 |
|            | Coef0          | 1      |
|            | Gamma          | Auto   |
|            | Tol            | 0.0482 |

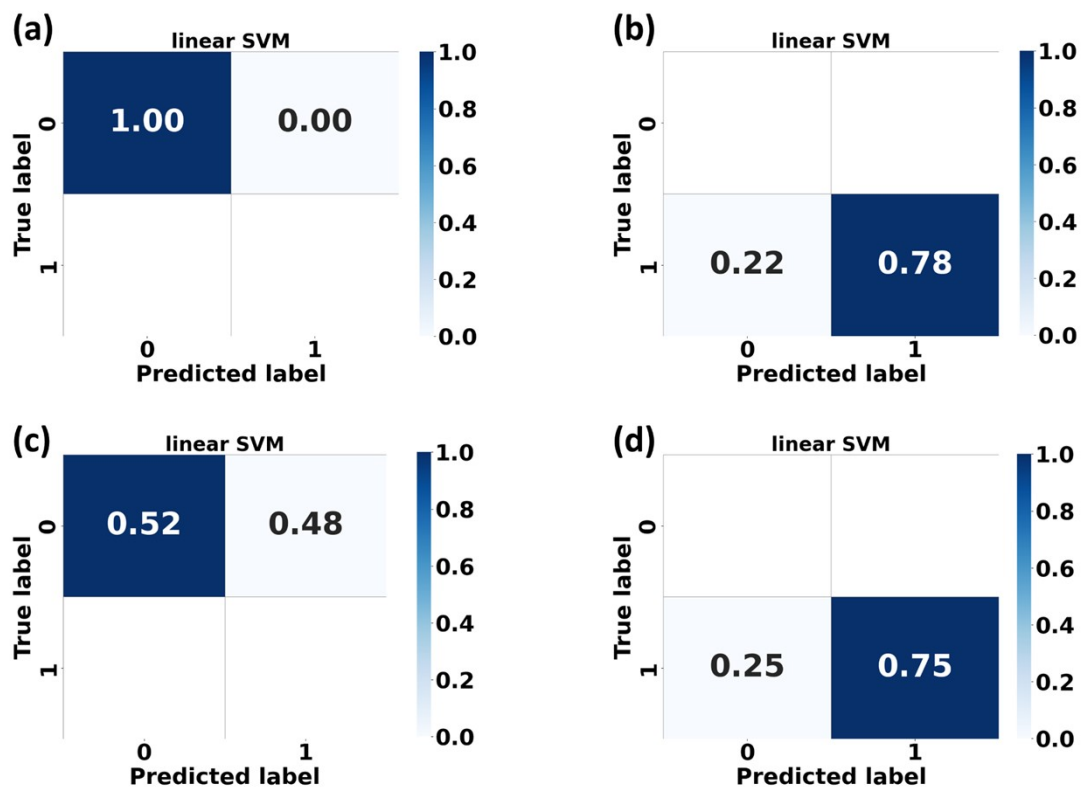

**Figure S10:** Confusion matrices for the test phase of the optimized Linear SVM models at optimal pH (4) for TNF detection, shown class by class. (a) Class 1: F12K medium (64 spectra), (b) Class 1: F12K + TNF (64 spectra), (c) Class 2: F12K + OSM (64 spectra), and (d) Class 2: F12K + TNF + OSM (64 spectra).

## Supplementary Bibliography

- [1] Azhar, U.; Ahmed, Q.; Ishaq, S.; Alwahabi, Z.T.; Dai, S. "Exploring Sensitive Label-Free Multiplex Analysis with Raman-Coded Microbeads and SERS-Coded Reporters". *Biosensors*, 12, 121, Feb. 2022. doi: 10.3390/bios12020121
- [2] Marques, F. C., Oliveira, G. P., Teixeira, R. A. R., Justo, R. M. S., Neves, T. B. V., & Andrade, G. F. S. . "Characterization of 11-mercaptoundecanoic and 3-mercaptopropionic acids adsorbed on silver by surface-enhanced Raman scattering". *Vibrational Spectroscopy*, 98, 139–144, (Aug. 2018). doi: 10.1016/j.vibspec.2018.07.015
- [3] Kudelski, A. . Structures of monolayers formed from different HS—(CH<sub>2</sub>)<sub>2</sub>—X thiols on gold, silver and copper: comparative studies by surface-enhanced Raman scattering. *Journal of Raman Spectroscopy*, 34(11), 853–862, (Oct. 2003). doi: 10.1002/jrs.1062
- [4] I. N. Saraeva *et al.*, "Analysis of Skin Neoplasms' Raman Spectra Using the Lorentz Approximation Method: Pilot Studies," *JETP Lett*, vol. 119, no. 7, pp. 556–563, Apr. 2024, doi: 10.1134/S0021364023604153.
- [5] M. A. Czarnecki, "Resolution Enhancement in Second-Derivative Spectra," *Appl Spectrosc*, vol. 69, no. 1, pp. 67–74, Jan. 2015, doi: 10.1366/14-07568.
- [6] S. Lee *et al.*, "Early-stage diagnosis of bladder cancer using surface-enhanced Raman spectroscopy combined with machine learning algorithms in a rat model," *Biosens Bioelectron*, vol. 246, p. 115915, Feb. 2024, doi: 10.1016/j.bios.2023.115915.
- [7] N. Pudjihartono, T. Fadason, A. W. Kempa-Liehr, and J. M. O'Sullivan, "A Review of Feature Selection Methods for Machine Learning-Based Disease Risk Prediction," *Frontiers in Bioinformatics*, vol. 2, Jun. 2022, doi: 10.3389/fbinf.2022.927312.
- [8] Z. Wang *et al.*, "Rapid Biomarker Screening of Alzheimer's Disease by Interpretable Machine Learning and Graphene-Assisted Raman Spectroscopy," *ACS Nano*, vol. 16, no. 4, pp. 6426–6436, Apr. 2022, doi: 10.1021/acsnano.2c00538.
- [9] J. Brank, M. Grobelnik, N. Milic-Frayling, and D. Mladenic, "Feature Selection Using Linear Support Vector Machines," Jun. 2002. [Online]. Available: <https://www.microsoft.com/en-us/research/publication/feature-selection-using-linear-support-vector-machines/>
- [10] Y.-H. Lee, J. H. Won, Q.-S. Auh, and Y.-K. Noh, "Age group prediction with panoramic radiomorphometric parameters using machine learning algorithms," *Sci Rep*, vol. 12, no. 1, p. 11703, Jul. 2022, doi: 10.1038/s41598-022-15691-9.
- [11] T. Wang, M. Shoaran, and A. Emami, "Towards Adaptive Deep Brain Stimulation in Parkinson's Disease: Lfp-Based Feature Analysis and Classification," in *2018 IEEE International Conference on Acoustics, Speech and Signal Processing (ICASSP)*, IEEE, Apr. 2018, pp. 2536–2540. doi: 10.1109/ICASSP.2018.8462472.
- [12] R. Kohavi, "A study of cross-validation and bootstrap for accuracy estimation and model selection," in *Proceedings of the 14th International Joint Conference on Artificial Intelligence - Volume 2*, in IJCAI'95. San Francisco, CA, USA: Morgan Kaufmann Publishers Inc., 1995, pp. 1137–1143. doi: 10.5555/1643031.1643047.
- [13] M. CHEMMAKHA, O. HABIBI, and M. LAZAAR, "Improving Machine Learning Models for Malware Detection Using Embedded Feature Selection Method," *IFAC-PapersOnLine*, vol. 55, no. 12, pp. 771–776, 2022, doi: 10.1016/j.ifacol.2022.07.406.
